1 **Supporting decision making: Modeling and forecasting measles in a London**  
2 **borough**

3 SHORT TITLE: Modeling and forecasting measles for decision support

4  
5 Stefan Edlund<sup>1</sup>, Derryn Lovett<sup>2</sup>, James Kaufman<sup>1</sup>, Kezban Yagci Sokat<sup>3</sup>, Johan van Wijgerden<sup>4</sup>,  
6 and Alan J. Poots<sup>2</sup>

7  
8 <sup>1</sup> IBM Almaden Research Center, 650 Harry Road, San Jose, California, 95120, USA

9 <sup>2</sup> National Institute for Health Research, CLAHRC NWL, London

10 <sup>3</sup> Northwestern University, Evanston, IL, USA

11 <sup>4</sup> National Health Service England (previously working for Ealing Primary Care Trust)

12

13 **Abstract**

14 To investigate the feasibility of using freeware to model and forecast disease on a  
15 local scale, we report the results of modeling measles using a spatial patch model  
16 centered around 73 clinics in the North West London Borough of Ealing. MMR1  
17 and MM2 immunization data was extracted for three cohorts, age 1-3, 4-6 and 7-  
18 19 and patient population was estimated using general practice profile records.

19

20 We designed the measles model using the open source Spatiotemporal Epidemi-  
21 ological Modeler (STEM), extending a compartmental disease model to include

22 both maternal immunity and delays in antibody response after immunization. In-  
23 dividuals above age 19 are not included in the modeling.

24

25 Next, we generate an approximate 20-year model of vaccination coverage for Eal-  
26 ing. In England, children are immunized between age 1 and 2, then again at  
27 around age 5; hence immunization events are modeled for the age 1-3 and age 4-6  
28 cohorts. Parameter values were based on measles research literature; transmission  
29 coefficients were estimated using the Polymod contact data and also fitted to  
30 2011-2012 case reporting data for Ealing.

31

32 To examine possible effects of policy change, we create two scenarios A and B.  
33 In A, we increase vaccination coverage by 10% for all clinics; in B, we focus only  
34 on the bottom 10% of the poorest performing clinics (8 clinics total) and equiva-  
35 lently improve their coverage. Scenario A reduces measles from an initial level of  
36 60 cases per year (2011) to 26 cases per year in 2017 (a 58% reduction), com-  
37 pared to the status quo which declines to 45 cases per year. Scenario B reduces  
38 measles by 44%, or to 34 cases per year in 2017.

39

40 We conclude that local scale modeling is possible, and that the transparency of  
41 analysis provided by an open source application lends credence to the output of  
42 the models.

43

44

## 45 **Keywords**

46 Measles, MMR, Simulation, Compartmental Disease Models, Forecasting, Epidemics

47

## 48 **INTRODUCTION**

49 The MMR vaccine is an immunization vaccine against measles, mumps and rubella and consists  
50 of live attenuated viruses from all three diseases. In developed countries, the vaccine is usually  
51 administered to children around age 1 and again before starting school at about age 5. In high-  
52 risk developing countries where healthcare infrastructure is lacking, mass vaccination campaigns  
53 have been credited with reducing the global measles disease deaths by 71% between 2000 and  
54 2011 [1].

55

56 Yet, even in developed countries, there has been an increase in measles cases; in 2012, there  
57 were more than 2,000 cases of measles in England and Wales alone, the highest figure for two  
58 decades [2]. The UK epidemic has been blamed in part on misleading information linking dis-  
59 eases on the autism spectrum to the MMR vaccine [3], leading to an overall reduction in the cov-  
60 erage of the vaccine. Estimates of the reproductive number of the virus ( $R_0$ ) show that an in-  
61 crease in  $R_0$  occurred almost immediately after the decrease in the MMR vaccine uptake in 1998  
62 [4].

63

64 The Spatiotemporal Epidemiological Modeler (STEM) provides an open source framework for  
65 building and evaluating spatiotemporal epidemiological models [5]. In addition to textbook ex-  
66 amples of disease models, STEM has denominator data for the entire world, including population

67 estimates, administrative regions with common border relationships, air transportation and road  
68 transportation networks, and earth science data (e.g. elevation and surface temperature). An open  
69 source project under the Eclipse Foundation, STEM can support collaboration within a commu-  
70 nity; research teams can share models they create as open contributions to STEM that can be  
71 freely used and extended thereby supporting peer-to-peer collaboration, review and refinement.

72

73 Here we present a localized measles study for the North West London borough of Ealing (Figure  
74 1), to examine the feasibility of using STEM at a high geographical and temporal resolution to  
75 support decision-making. STEM is used to model the disease burden of measles and to forecast  
76 two scenarios congruent to policy options. As a localized study, both spatially and temporally,  
77 we do not expect to reproduce the epidemic that the rest of England and especially Wales have  
78 experienced in recent years. Instead, our intent is to assess the potential impact of changes in  
79 MMR vaccination coverage for a local set of General Practitioners (GPs) in Ealing; thereby guid-  
80 ing recommendations as to which strategy would have best effect (particularly relevant given  
81 limited resources) and testing the feasibility of modeling for local public health decision makers.

82

## 83 **METHODS**

### 84 **Summary**

85 Time-series data on vaccination coverage between age 1 and 2 (MMR1) and booster vaccination  
86 at or around age 5 (MMR2), are used to build a measles model parameterized from measles re-  
87 search literature. We studied four cohorts in particular, age 0-<1, 1-3, 4-6 and 7-19. The second  
88 and third cohorts were chosen around the average of the age of vaccination. We cut off the last

89 cohort at age 19; since measles is rare in the adult population, we assume immunity is acquired at  
90 this point.

91

92 We build two predictive scenarios out 5 years into the future. In the first, scenario A, we improve  
93 vaccination coverage for both initial and booster dose by 10% for all clinics, capped at 100%. In  
94 the second, scenario B, we pick the 10% worst performing clinics and similarly improve their  
95 coverage.

96

## 97 **Demographic and Inoculation Data**

98 Ealing Primary Care Trust (PCT), now with the NHS transformation a Clinical Commissioning  
99 Group, provided vaccination data used in our evaluation. The data include two years (2011 and  
100 2012) of monthly MMR1 and MMR2 vaccination coverage for 73 GPs in Ealing. The data were  
101 provided as two components: a denominator representing the total number of children having a  
102 birthday in a given month for whom the clinic was responsible, and a numerator indicating the  
103 number of children having a birthday in the month who received a vaccination. MMR1 coverage  
104 data were provided for the age 1-3 cohort; whilst MMR1 and MMR2 coverage data were pro-  
105 vided for the age 4-6 and age 7-19 cohorts.

106

107 An examination of the vaccination coverage of the 73 Ealing GPs (see supplementary file) is that  
108 it has increased from January 2011 to October 2012 (i.e., compare age 1-3 and 4-6 versus 7-19),  
109 which could be due to more positive media reporting of MMR vaccination, NHS-led vaccination  
110 campaigns and improved data quality as consequence of local improvement initiatives, such as  
111 the feedback of GP data to the practices.

## 112 **Spatial Model**

113 The spatial model used for the 73 GP clinics was constructed using a Voronoi tessellation meth-  
114 od [6] around the geographic coordinates of the clinics (Figure 2). These do not represent the  
115 true extents, which are overlapping, but provide a medium for visual representation of change to  
116 be displayed. This method is scalable to large numbers of GPs without a burdensome collection  
117 and digitization regimen.

118  
119 The total patient population for each clinic was estimated from GP profile records provided by  
120 the Association of Public Health Observatories (APHO), and the cohort ages were assumed uni-  
121 formly distributed. The total population age 0-19 for all of Ealing was estimated at 95,775.

122  
123 In Figure 3 and Figure 4, we show a plot of vaccination coverage averaged over all 73 clinics in  
124 Ealing. For the plot in Figure 3, one data point should be interpreted as the fraction of children  
125 having their birthday in the given month and who received one dose of MMR vaccine on or after  
126 their first birthday. A data point in Figure 4 represents the fraction of children whose birthday  
127 falls within the month and who received two doses of MMR vaccine, where the first dose was  
128 given on or after their first birthday.

## 129 130 **Measles Transmission Model**

131 A SEIR compartmental model [7] is developed to study the spread of measles and the effect of  
132 vaccination, extended with an M compartment to capture maternal immunity and a V compart-  
133 ment for individuals vaccinated (but not yet immune). M, S, E, I, R and V represent the maternal  
134 immunity, susceptible, exposed, infected, recovered and vaccinated populations respectively. N

135 is the total population size which is the summation of all children and adolescents in all these  
136 states at a given time period ( $N=M+S+E+I+R+V$ ).

137

138 The differential equations of the system are given below. The number in subscript represents the  
139 individual cohorts, where 0 is age 0 and 1 is age 1-3 etc. There are four sets of equations for the  
140 four cohorts modeled. In the first set of equations (Eq. 1a-e), new children are added to the popu-  
141 lation with a rate of  $\mu$ . Initially, a child is protected by the maternal immunity for a period of  $(1/$   
142  $\lambda_b)$  year where  $\lambda_b$  is the maternal immunity loss rate. This is also the rate they enter the suscepti-  
143 ble compartment. The next three terms in the Susceptible equation express the number of new  
144 infections due to interactions between infected children and adolescents in all three cohorts. Ex-  
145 posed children are removed from this compartment and enter the Infected compartment with an  
146 incubation rate of  $\gamma$  ( $\text{day}^{-1}$ ). Infected children are removed from this compartment with a recov-  
147 ery rate of  $\alpha$  ( $\text{day}^{-1}$ ). The Recovered compartment tracks the number of children who acquired  
148 natural immunity by recovering from the infection with a rate of  $\alpha$ .

149

150 Eq. 2a-f and Eq. 3a-f resemble Eq. 1a-e, but also introduce a Vaccination term [8]. The last term  
151 in the susceptible rate change equation accounts for vaccination where  $v$  is the vaccine efficacy.  
152 The equation for Recovered is extended with a term for children who acquire passive immunity  
153 by vaccination with an inoculated immunity rate of  $\sigma$  ( $\text{day}^{-1}$ ). Children enter into the Vaccinated  
154 compartment with vaccinations during the Susceptible state; they leave this compartment either  
155 via Infections, which is expressed with the next three terms in the vaccinated compartment rate  
156 change equation, or by acquiring passive immunity. In addition to the number of new infections  
157 due to interactions of Susceptible children with the infected children, the number of new infec-

158 tions due to interactions of vaccinated (but not yet immune) children with the infected children is  
 159 accounted for the rate change in Exposed children. In Eq. 2-4, the first term in each equation rep-  
 160 resents aging. In addition to aging, adolescents are removed from the system in the last term for  
 161 equation set 4. So newborns are entered into the system at a rate  $\mu$  in the first cohort and removed  
 162 from the system at a rate  $\mu$  in the last cohort. This way we ensure that the total population re-  
 163 mains constant.

164

165 The last equation (Eq. 5) shows the sinusoidal function used to model seasonal forcing,  $m(t)$   
 166 where  $\delta$ ,  $\theta$ , and  $\omega$  represents the magnitude of the seasonal variation, phase shift and modulation  
 167 period. Seasonal changes in measles transmission can be explained by changes in social be-  
 168 havior, for instance, increased contact and thus increased transmission during the school year [9].

169

170

$$\begin{aligned}
 \frac{dM_0}{dt} &= \mu N - \lambda_b M_0 \\
 \frac{dS_0}{dt} &= \lambda_b M_0 - m(t)\beta_{00}S_0 \frac{I_0}{N} - m(t)\beta_{01}S_0 \frac{I_1}{N} - m(t)\beta_{02}S_0 \frac{I_2}{N} - m(t)\beta_{03}S_0 \frac{I_3}{N} \\
 171 \quad \frac{dE_0}{dt} &= m(t)\beta_{00}S_0 \frac{I_0}{N} + m(t)\beta_{01}S_0 \frac{I_1}{N} + m(t)\beta_{02}S_0 \frac{I_2}{N} + m(t)\beta_{03}S_0 \frac{I_3}{N} - \gamma E_1 \\
 \frac{dI_0}{dt} &= \gamma E_0 - \alpha I_0 \\
 \frac{dR_1}{dt} &= \alpha I_0
 \end{aligned}
 \tag{Eq 1a-e}$$

172



$$\begin{aligned}
 \frac{dM_1}{dt} &= \frac{1}{D_0} M_0 - \lambda_b M_1 \\
 \frac{dS_1}{dt} &= \frac{1}{D_0} S_0 + \lambda_b M_1 - m(t)\beta_{10} S_1 \frac{I_0}{N} - m(t)\beta_{11} S_1 \frac{I_1}{N} - m(t)\beta_{12} S_1 \frac{I_2}{N} - m(t)\beta_{13} S_1 \frac{I_3}{N} - \vartheta \frac{im_1(t)}{N_1} S_1 \\
 \frac{dE_1}{dt} &= \frac{1}{D_0} E_0 + m(t)\beta_{10} (S_1 + V_1) \frac{I_0}{N} + m(t)\beta_{11} (S_1 + V_1) \frac{I_1}{N} + m(t)\beta_{12} (S_1 + V_1) \frac{I_2}{N} + m(t)\beta_{13} (S_1 + V_1) \frac{I_3}{N} - \gamma E_1 \\
 \frac{dI_1}{dt} &= \frac{1}{D_0} I_0 + \gamma E_1 - \alpha I_1 \\
 \frac{dR_1}{dt} &= \frac{1}{D_0} R_0 + \alpha I_1 + \sigma V_1 \\
 \frac{dV_1}{dt} &= \vartheta \frac{im_1(t)}{N_1} S_1 - m(t)\beta_{10} V_1 \frac{I_0}{N} - m(t)\beta_{11} V_1 \frac{I_1}{N} - m(t)\beta_{12} V_1 \frac{I_2}{N} - m(t)\beta_{13} V_1 \frac{I_3}{N} - \sigma V_1
 \end{aligned} \tag{Eq. 2a-f}$$

$$\begin{aligned}
 \frac{dM_2}{dt} &= \frac{1}{D_1} M_1 - \lambda_b M_2 \\
 \frac{dS_2}{dt} &= \frac{1}{D_1} S_1 + \lambda_b M_2 - m(t)\beta_{20} S_2 \frac{I_0}{N} - m(t)\beta_{21} S_2 \frac{I_1}{N} - m(t)\beta_{22} S_2 \frac{I_2}{N} - m(t)\beta_{23} S_2 \frac{I_3}{N} - \vartheta \frac{im_2(t)}{N_2} S_2 \\
 \frac{dE_2}{dt} &= \frac{1}{D_1} E_1 + m(t)\beta_{20} (S_2 + V_2) \frac{I_0}{N} + m(t)\beta_{21} (S_2 + V_2) \frac{I_1}{N} + m(t)\beta_{22} (S_2 + V_2) \frac{I_2}{N} + m(t)\beta_{23} (S_2 + V_2) \frac{I_3}{N} - \gamma E_2 \\
 \frac{dI_2}{dt} &= \frac{1}{D_1} I_1 + \gamma E_2 - \alpha I_2 \\
 \frac{dR_2}{dt} &= \frac{1}{D_1} R_1 + \alpha I_2 \\
 \frac{dV_2}{dt} &= \frac{1}{D_1} V_1 + \vartheta \frac{im_2(t)}{N_2} S_2 - \sigma V_2 - m(t)\beta_{20} V_2 \frac{I_0}{N} - m(t)\beta_{21} V_2 \frac{I_1}{N} - m(t)\beta_{22} V_2 \frac{I_2}{N} - m(t)\beta_{23} V_2 \frac{I_3}{N}
 \end{aligned} \tag{Eq. 3a-f}$$

$$\begin{aligned}
 \frac{dM_3}{dt} &= \frac{1}{D_2} M_2 - \lambda_b M_3 - \mu M \\
 \frac{dS_3}{dt} &= \frac{1}{D_2} S_2 + \lambda_b M_3 - m(t)\beta_{30} S_3 \frac{I_0}{N} - m(t)\beta_{31} S_3 \frac{I_1}{N} - m(t)\beta_{32} S_3 \frac{I_2}{N} - m(t)\beta_{33} S_3 \frac{I_3}{N} - \mu S \\
 \frac{dE_3}{dt} &= \frac{1}{D_2} E_2 + m(t)\beta_{30} (S_3 + V_3) \frac{I_0}{N} + m(t)\beta_{31} (S_3 + V_3) \frac{I_1}{N} + m(t)\beta_{32} (S_3 + V_3) \frac{I_2}{N} + m(t)\beta_{33} (S_3 + V_3) \frac{I_3}{N} - \gamma E_3 - \mu E \\
 \frac{dI_3}{dt} &= \frac{1}{D_2} I_2 + \gamma E_3 - \alpha I_3 - \mu I \\
 \frac{dR_3}{dt} &= \frac{1}{D_2} R_2 + \alpha I_3 - \mu R \\
 \frac{dV_3}{dt} &= \frac{1}{D_2} V_2 - \sigma V_3 - m(t)\beta_{30} V_3 \frac{I_0}{N} - m(t)\beta_{31} V_3 \frac{I_1}{N} - m(t)\beta_{32} V_3 \frac{I_2}{N} - m(t)\beta_{33} V_3 \frac{I_3}{N} - \mu V
 \end{aligned} \tag{Eq. 4a-f}$$

176 
$$m(t) = \beta_s \left( 1 + \frac{(\delta - 1) \left( 1 + \cos \left( 2\pi \left( \phi + \frac{t}{\omega} \right) \right) \right)}{2} \right)$$
 (Eq. 5)

177

## 178 **Parameterization**

179 Descriptions of the parameters, their values and the references are shown in Table 1. The esti-  
180 mated duration of maternal immunity varies from 3 to 6 months (10-13). We use 4 months as  
181 advocated by Bjornstad et al. [14].

182

183 The incubation period varies from 7 to 18 days [15]. The most common value of the incubation  
184 period is 10 days hence our incubation rate is 0.1 (day<sup>-1</sup>) using the Public Health Agency of Can-  
185 ada [16]. Similarly, the most commonly reported value of infectious period (8 days) is used to  
186 obtain the recovery rate [17].

187

188 To find the contact rates between cohorts, we use contact data from the Polymod project [18],  
189 see Figure 6. The data was compiled from 7,290 participants reporting over 90,000 contacts with  
190 different individuals during a day, including age, sex, location and duration. The study indicates  
191 that 5- to 19-year-olds are expected to suffer the highest incidence during the initial epidemic  
192 phase infection transmitted through social contacts, which can also be seen in Figure 6 where the  
193 data for UK is shown.

194

195 When a child receives a dose of measles vaccine, it takes on average 10 days for the vaccine to  
196 give protection [19]. Thus, the inoculated immunity rate  $\sigma$  is 0.1 (day<sup>-1</sup>). Measles vaccine is as-  
197 sumed 95% effective after a dose is applied as per Centers for Disease Control and Prevention

198 [20]. Measles transmission is assumed seasonal, captured as a sinusoidal function using a 1 year  
199 modulation period with 25% increase in transmission during peak season [21]. An individual is  
200 expected to shed the measles virus for an average of 10 days [17,22].

201

## 202 **Analytical Approach**

203 The first step in the analytic study is to estimate, for each cohort, an initial state of measles in the  
204 population. To accomplish this we used the oldest available vaccination coverage data for chil-  
205 dren aged 7-19 in 2011 and 2012, and ran a model with a random initial condition repeatedly un-  
206 til convergence. We determined that the state of the population at convergence had only a small  
207 sensitivity to the initial condition. In particular, over 100 separate runs with randomly set initial  
208 condition and after 100,000 days of simulation time, the total incidence (all cohorts) in the last  
209 year was 558.2 with a standard deviation of 13.9, within the error tolerance of the integrator. In  
210 essence, the oldest vaccination coverage data provided is assumed to have been in place since  
211 “beginning of time”. However, the error introduced by this assumption is somewhat mitigated by  
212 the fact that adults above age 20 (whose immune state is more difficult to estimate when lacking  
213 historic data) are not included in the modeling. STEM was used to run the simulations required  
214 to establish the initial conditions.

215

## 216 **Predictive Model**

217 Two different vaccination improvement scenarios were studied for consideration by Ealing pub-  
218 lic health. For the first strategy (scenario A), we assume improved vaccination coverage by 10%  
219 in all clinics (so a clinic with say 80% coverage increases to 88%). In the second strategy (sce-  
220 nario B), only the 10% of poorest performing clinics (8 clinics total) were assumed to increase

221 their vaccination coverage by 10%. These 8 poorest performing clinics were selected according  
222 to their vaccination coverage averages for both MMR1 and MMR2 and across all cohorts (except  
223 for cohort 0). Measles incidence is modeled 5 years into the future for both of these alternatives,  
224 and compared to the status quo where the vaccination coverage is kept identical to the most re-  
225 cent data (MMR1 from age group 1-3 and MMR2 from age group 4-6).

226

## 227 **RESULTS**

228 In Figure 7 panel A, we show the infectious cases on Feb 1 2012 (deeper red indicates more  
229 measles cases). This is the reference used in panel B-D. In panel B, the ratio between the number  
230 of infectious cases on Feb 1 2017 and the reference is computed. The color legend in the center  
231 indicates the computed ratio. In panels C and D, the same ratio is computed for scenario A and  
232 scenario B respectively.

233

234 In Figure 8 we show the daily measles incidence for the four cohorts at year 2011 and 2012. To-  
235 tal incidence for age 0-19 in 2011 is around 60 cases, dropping to about 42 cases in 2012. In data  
236 provided by Public Health England (PHE) measles surveillance program, the total number of  
237 cases of measles in 2011 in Ealing was 42 (confirmed + possible + probable); in 2012 the num-  
238 ber was 28. This gives us a reporting fraction of about 66-70%, which is within the expected  
239 range [23].

240

241 Figure 9 shows total measles incidence predicted out 5 years (2013-2017) for the two scenarios  
242 studied as well as the status quo case. When we improve vaccination coverage by 10% for all  
243 clinics, measles declines from an initial level of 60 cases per year (2011) to 26 cases per year in

244 2017, compared to a business as usual scenario in which measles decline to 45 cases per year.  
245 When we only focus on improving performance for the bottom 10% of poorly performing clinics  
246 (8 clinics total), measles incidence is reduced to 34 cases per year in 2017.

247

## 248 **DISCUSSION**

249 Our work demonstrates how a tool such as STEM can be used by epidemiologists and public  
250 health experts to evaluate the impact of strategies to improve vaccination efficacy. Once a refer-  
251 ence model is developed based on available data, it is fairly straightforward to integrate the ref-  
252 erence model into the future subject to a range of plausible assumptions. With no intervention or  
253 campaign to improve vaccination coverage, the base model predicts a 25% decline in measles  
254 incidence. If vaccination coverage is improved by 10% for only the 10% poorest performing  
255 clinics (8 of the 73), the model predicts that a relatively large reduction in measles (44%) can be  
256 realized over 5 years. Improving the performance of all clinics would yield a 58% decrease in  
257 incidence after 5 years.

258

259 Selection of an appropriate strategy depends, of course, on economic considerations as well as  
260 questions concerning detailed requirements of an education campaign. For example, could the  
261 same education materials designed to target the neighborhoods with the lowest vaccination cov-  
262 erage be used for all clinics, or are there specific education needs based on demographic differ-  
263 ences between local communities that would require more customized vaccination education  
264 campaigns? These questions are beyond the scope of the existing models, but the two alternative  
265 intervention models developed here demonstrate how a range of alternative interventions strate-  
266 gies can be quickly evaluated.

## 267 **Limitations**

268 There are several challenges to tackle modeling the effect of immunization on measles transmis-  
269 sion for a spatially local region such as Ealing.

270  
271 First, the MMR1 and MMR2 immunization data itself is not perfect. The denominator compo-  
272 nent of the data (number of children a clinic is responsible for) tends to be too high since track-  
273 ing children in a borough with a high throughput is challenging. There is often a delay before a  
274 child is removed from the register of a clinic when moving out. The numerator (number of chil-  
275 dren vaccinated) tends to be too low as the vaccination Read-code (the code which the MMR  
276 vaccination is recorded against the child) is not always adhered to. GP clinics do not always re-  
277 cord full immunization histories on their IT system, particularly if the child is over the age of 5.  
278 Consequently, our vaccination coverage data tends to be underestimated resulting in possible  
279 overestimation of disease transmission.

280  
281 Second, the specified measles model itself is not a perfect representation of the world, as with all  
282 models. One important factor missing is modeling of imported measles cases from regions exter-  
283 nal to Ealing. It is possible that some cases are imported due to infected individuals visiting Eal-  
284 ing.

285  
286 Third, as discussed above, there are challenges in defining the initial condition for our simula-  
287 tion. There is a weakness in the assumption that the oldest MMR1 and MMR2 data we have ac-  
288 curately reflect the performance of clinics going back to the “beginning of time”. Measles vacci-  
289 nation was introduced in the UK only in 1968, but there is no continuous high resolution com-

290 prehensive data set back to that time. However, by not considering people born before 1992 in  
291 our modeling, we somewhat mitigate the error in that the immune state of older (removed) indi-  
292 viduals is ignored. There is also a weakness introduced by the assumption of constant birth rate  
293 and death rate, resulting in a uniform distribution of population members into the cohorts used.  
294 By taking advantage of historical births and deaths data for Ealing (or if missing, at least UK da-  
295 ta), a better estimate of the total size in each cohort could be established. With the promise of  
296 electronic health records, over time recording a more comprehensive history of measles in the  
297 population should greatly improve our knowledge of the population state and aid in ongoing  
298 modeling efforts.

299

## 300 **Strengths**

301 We demonstrated the usefulness of using an open source tool, in this case STEM, both to model  
302 infectious disease spread and to measure the impact of alternative intervention strategies such as  
303 improved vaccination coverage. The model used is available to any researcher to use freely, al-  
304 lowing transparency of analysis for peer refinement and critique. Furthermore, the new model  
305 generator tool available in STEM 2.0 enables even non-expert users to create, build upon and test  
306 any model of disease, including the measles model.

307

308 Using the shapefile import feature in STEM, custom spatial models can be imported and used  
309 directly in STEM, in this case Voronoi polygons derived from locations of medical clinics, al-  
310 lowing easy integration with external tools such as ESRI's ArcGIS. It is also easy to import time  
311 series of vaccination coverage data into STEM, and using a simple drag-and-drop interface to  
312 drag those coverage data into any model of disease being studied. This flexibility is important, as

313 measles reporting (and public health reporting in general) is not always based on administrative  
314 boundaries or postal codes. Using Voronoi tessellation it was possible to generate a spatial graph  
315 based on clinical regions or point of care.

316

317 George E. P. Box [24] observed that “essentially, all models are wrong, but some are useful”.  
318 Modeling can advise the development of public health policy, but given the uncertainties associ-  
319 ated with public health data, it is essential that the assumptions built into such models and the  
320 models themselves be fully transparent. Perhaps the greatest strength of STEM is not the use of  
321 advanced software technology but the transparency that comes with open source. The Eclipse  
322 Foundation provides a community with the tools required so others can build upon existing mod-  
323 els to explore the *range of likely outcomes* expected from available data as opposed to running  
324 closed or proprietary models generating predictions from a “black box”.

325

## 326 **CONCLUSION**

327 We have demonstrated the feasibility of using open source software (STEM) at fine geospatial  
328 and temporal resolutions, with routine data, to provide a resource to support for public health de-  
329 cision makers in examining possible effects of policy change. In the future, we would like to ex-  
330 tend the work to a larger spatial region, perhaps all of London or even England and also include  
331 imported measles into the model. We would like to investigate the role movement of individuals  
332 plays in the spread of measles. In addition, evaluation of a broader range of interventions would  
333 be useful; targeting vaccinations to different age groups. Also, we’re interested in modeling the  
334 effects on the wider healthcare system, e.g., reductions in emergency admissions and attribution



335 of costs of intervention and disease. Ultimately, the goal is to allow non-technical users to build  
336 models of infectious disease, upload data and evaluate interventions strategies for patient benefit.

337

### 338 **Acknowledgements**

339 Thanks to NIHR CLAHRC NWL, NHS and Ealing PCT for sharing the immunization data used  
340 in this paper and PHE for providing case reporting data. Thanks also go to Eclipse for its support  
341 of the STEM Project.

342

### 343 **Disclaimer**

344 This article presents independent research commissioned by the National Institute for Health Re-  
345 search (NIHR) under the Collaborations for Leadership in Applied Health Research and Care  
346 (CLAHRC) programme for North West London. The views expressed in this publication are  
347 those of the author(s) and not necessarily those of the NHS, the NIHR or the Department of  
348 Health.

349

### 350 **References**

351 1. World Health Organization (2013) Measles fact sheet 286. Available:  
352 <http://www.who.int/mediacentre/factsheets/fs286/en/>. Accessed: 15 December 2013.

353

354 2. British Broadcasting Corporation (2013) Measles outbreak in maps and graphics. Available:  
355 <http://www.bbc.co.uk/news/health-22277186>. Accessed: 15 December 2013.

356

- 357 3. Wakefield AJ, Murch SH, Anthony A, Linnel J, Casston DM, et al. (1998) Ileal-lymphoid-  
358 nodular hyperplasia, non-specific colitis, and pervasive development disorder in children. *Lancet*  
359 *Journal* 351(9103): 637-641. RETRACTED.
- 360
- 361 4. Jansen VAA, Stollenwerk N, Jensen HJ, Ramsay ME, Edmunds WJ et al. (2003) Measles out-  
362 breaks in a population with declining vaccine uptake. *Science* 301(5634): 804.
- 363
- 364 5. Kaufman J, Edlund S, Douglas J. (2009). "Infectious disease modeling: creating a community  
365 to respond to biological threats." *Statistical Communications in Infectious Diseases*, Vol 1, Issue  
366 1, Article 1. The Berkeley Electronic Press.
- 367
- 368 6. Voronoi G (1908). Nouvelles applications des paramètres continus à la théorie des formes  
369 quadratiques. *Jdie Reine und Angewandte Mathematik* 133: 97–178.
- 370
- 371 7. Anderson RM, May R (1991) *Infectious diseases of humans: dynamics and control*. New  
372 York: Oxford Science Publications.
- 373
- 374 8. Health Protection Agency of UK (2010) HPA National Measles Guidelines: Local & Regional  
375 Services. Available: [http://www.hpa.org.uk/webc/HPAwebFile/HPAweb\\_C/1274088429847](http://www.hpa.org.uk/webc/HPAwebFile/HPAweb_C/1274088429847).  
376 Accessed: 14 December 2013.
- 377
- 378 9. Wallinga J, Heijne JCM, Kretzschmar M (2005) A measles epidemic threshold in a highly  
379 vaccinated population. *PLoS Med* 2(11): e316

- 380
- 381 10. Babad HR, Nokes DJ, Gay NJ, Miller E, Morgan-Capner P, Anderson RM (1995) Predicting  
382 the impact of measles vaccination in England and Wales: model validation and analysis of policy  
383 options. *Epidemiol Infect* 114:319–41.
- 384
- 385 11. Gay NJ, Hesketh LM, Morgan-Capner P, Miller E (1995) Interpretation of serological  
386 surveillance data for measles using mathematical models: implications for vaccine strategy.  
387 *Epidemiol Infect* 115:139–56.
- 388
- 389 12. Edmunds WJ, Gay NJ, Kretzschmar M, Pebody RG, Wachmann H (2000) European Sero-  
390 epidemiology Network. The pre-vaccination epidemiology of measles, mumps and rubella in  
391 Europe: implications for modelling studies. *Epidemiol Infect* 125: 635-50.
- 392
- 393 13. Simons E, Mort M, Dabbagh A, Strebel P, Wolfson L (2011) Strategic planning for measles  
394 control: using data to inform optimal vaccination strategies. *J Infect Dis* 204(Suppl 1):S28–34.
- 395
- 396 14. Bjornstad ON, Finkenstadt BF, Grenfell BT (2002) Dynamics of measles epidemics: estimat-  
397 ing scaling of transmission rates using a time series SIR model. *Ecol Monogr* 72(2): 185-202.
- 398
- 399 15. Health Protection Agency of UK (2010) HPA National Measles Guidelines: Local & Re-  
400 gional Services. Available:  
401 [http://www.hpa.org.uk/webc/HPAwebFile/HPAweb\\_C/1274088429847](http://www.hpa.org.uk/webc/HPAwebFile/HPAweb_C/1274088429847).  
402 Accessed: 14 December 2013.

- 403
- 404 16. Public Health Agency of Canada (2013) Measles. Available: <http://www.phac->
- 405 [aspc.gc.ca/im/vpd-mev/measles-rougeole-eng.php](http://www.phac-aspc.gc.ca/im/vpd-mev/measles-rougeole-eng.php). Accessed: 14 December 2013.
- 406
- 407 17. Perez L, Dragicevic S (2009) An agent-based approach for modeling dynamics of contagious
- 408 disease spread. *Int J Health Geogr* 8:50.
- 409
- 410 18. Mossong J, Hens N, Jit M, Beutels P, Auranen K, et al. (2008) Social contacts and mixing
- 411 patterns relevant to the spread of infectious diseases. *PLoS Med* 5(3): e74.
- 412 doi:10.1371/journal.pmed.0050074
- 413
- 414 19. The MMR vaccinae and your questions answered. Available:
- 415 <http://www.babyexpert.com/baby/health/the-mmr-vaccine-and150-your-questions->
- 416 [answered/2207.html](http://www.babyexpert.com/baby/health/the-mmr-vaccine-and150-your-questions-answered/2207.html). Accessed: 9 January 2014
- 417
- 418 20. Fiebelkorn AP, Goodson JL (2012) Infectious diseases related to travel. In: *The Yellow*
- 419 *Book*. Available: <http://wwwnc.cdc.gov/travel/yellowbook/2012/chapter-3-infectious-diseases->
- 420 [related-to-travel/measles-rubeola](http://wwwnc.cdc.gov/travel/yellowbook/2012/chapter-3-infectious-diseases-related-to-travel/measles-rubeola). Accessed: 14 December 2013.
- 421
- 422 21. Wallinga J, Heijne JCM, Kretzschmar M (2005) A measles epidemic threshold in a highly
- 423 vaccinated population. *PLoS Med* 2(11): e316
- 424

- 425 22. Hooker G, Ellner SP, Roditi LvD, Earn DJ (2011) Parameterizing state-space models for in-  
426 fectious disease dynamics by generalized profiling: measles in Ontario, JR S Interface 8:961-  
427 975.
- 428 23. Edmunds WJ, Gay NJ, Kretzschmar M, Pebody RG, Wachmann H. European Sero-  
429 epidemiology Network. The pre-vaccination epidemiology of measles, mumps and rubella in  
430 Europe: implications for modelling studies. Epidemiol Infect 2000; 125: 635-50.
- 431 24. Box G E, Draper NR (1987). Empirical model-building and response surfaces. Boston: John  
432 Wiley & Sons.
- 433
- 434

434  
435

Table 1. Parameter values used in the measles model

| Description                                                             | Symbol                | Value                              | Resource/Reference   |
|-------------------------------------------------------------------------|-----------------------|------------------------------------|----------------------|
| Background birth/death rate                                             | $\mu$                 | 1/20 (year <sup>-1</sup> )         | Constrained by model |
| Maternal immunity loss rate                                             | $\lambda_b$           | 3 (year <sup>-1</sup> )            | [a]                  |
| Transmission rate between cohort $i=(0,1,2,3)$ and cohort $j=(0,1,2,3)$ | $B_{ij}$              | Polymod data                       | [b]                  |
| Vaccine efficacy                                                        | $v$                   | 0.95                               | [c]                  |
| Total MMR 1 immunizations at time $t$                                   | $im_1(t)$             | Ealing PCT                         | [d]                  |
| Total population cohort $i=(0,1,2,3)$                                   | $N_i$                 | APHO/ONS                           | [e]                  |
| Incubation rate*                                                        | $\gamma$              | 0.1 (day <sup>-1</sup> ) (.06-.14) | [f] [g]              |
| Recovery rate*                                                          | $\alpha$              | 0.125 (day <sup>-1</sup> ) (.2-NA) | [h] [i]              |
| Inoculated Immunity Rate                                                | $\sigma$              | 0.1 (day <sup>-1</sup> )           | [j]                  |
| Length of cohort 0                                                      | $D_0$                 | 1 year                             |                      |
| Total MMR 2 immunizations at time $t$                                   | $im_2(t)$             | Ealing PCT                         | [d]                  |
| Length of cohort 1                                                      | $D_1$                 | 1 year                             | Length of cohort 1   |
| Length of cohort 2                                                      | $D_2$                 | 3 years                            | Length of cohort 2   |
| Length of cohort 3                                                      | $D_3$                 | 3 years                            | Length of cohort 3   |
| Length of cohort 4                                                      | $D_4$                 | 13 years                           | Length of cohort 4   |
| Total populations all cohorts                                           | $N, M, S, E, I, R, V$ | APHO/ONS                           | [e]                  |
| Magnitude of seasonal variation                                         | $\delta$              | 1.25                               | [k]                  |
| Phase shift                                                             | $\theta$              | 0                                  |                      |
| Modulation period                                                       | $\omega$              | 1 year                             |                      |
| Transmission Rate Scaling                                               | $\beta_s$             | 0.432                              | Fitted               |

436  
437  
438

\* The values in parentheses represent the minimum and maximum value for the parameter.

439 **References for Parameter Values in Table 1**

- 440 [a] Bjornstad ON, Finkenstadt BF, Grenfell BT (2002) Dynamics of measles epidemics: estimating scaling of trans-  
441 mission rates using a time series SIR model. *Ecol Monogr* 72(2): 185-202
- 442 [b] Mossong J, Hens N, Jit M, Beutels P, Auranen K, et al. (2008) Social contacts and mixing patterns relevant to the  
443 spread of infectious diseases. *PLoS Med* 5(3): e74. doi:10.1371/journal.pmed.0050074
- 444 [c] Fiebelkorn AP, Goodson JL (2012) Infectious diseases related to travel. In: *The Yellow Book*. Available:  
445 <http://wwwnc.cdc.gov/travel/yellowbook/2012/chapter-3-infectious-diseases-related-to-travel/measles-rubeola>.  
446 Accessed: 14 December 2013.
- 447 [d] Ealing Primary Care Trust. <http://www.ealinglink.org>
- 448 [e] Association of Public Health Observatories/Office of National Statistics. Now available at  
449 <http://gov.uk/governemtn/organisations/public-health-england>
- 450 [f] Public Health Agency of Canada. (2013) Measles. Available: [http://www.phacaspe.gc.ca/im/vpd-mev/measles-](http://www.phacaspe.gc.ca/im/vpd-mev/measles-rougeole-eng.php)  
451 [rougeole-eng.php](http://www.phacaspe.gc.ca/im/vpd-mev/measles-rougeole-eng.php). Accessed: 14 December 2013
- 452 [g] Health Protection Agency of UK (2010) HPA National Measles Guidelines: Local and Regional Services. Available:  
453 [http://www.hpa.org.uk/webc/HPAwebFile/HPAweb\\_C/1274088429847](http://www.hpa.org.uk/webc/HPAwebFile/HPAweb_C/1274088429847). Accessed: 14 December 2013
- 454 [h] Perez L, Dragicevic S (2009) An agent-based approach for modeling dynamics of contagious disease spread. *Int J*  
455 *Health Geogr* 8:50.
- 456 [i] Hooker G, Ellner SP, Roditi LvD, Earn DJ (2011) Parameterizing state-space models for infectious disease dynam-  
457 ics by generalized profiling: measles in Ontario, *JR S Interface* 8:961-975.
- 458 [j] The MMR vaccinae and your questions answered. Available: [http://www.babyexpert.com/baby/health/the-](http://www.babyexpert.com/baby/health/the-mmr-vaccine-and150-your-questions-answered/2207.html)  
459 [mmr-vaccine-and150-your-questions-answered/2207.html](http://www.babyexpert.com/baby/health/the-mmr-vaccine-and150-your-questions-answered/2207.html). Accessed: 9 January 2014
- 460 [k] Wallinga J, Heijne JCM, Kretzschmar M (2005) A measles epidemic threshold in a highly vaccinated population.  
461 *PLoS Med* 2(11): e316

462

463 **Figure Legends**

464

465 Figure 1. Locations of Ealing and Ealing General Practice Clinics.

466

467 Figure 2. Voronoi Tessellation around the geographic coordinates of the 73 Ealing General Prac-  
468 tices.

469

470 Figure 3. MMR1 Vaccination Coverage for 2011 and 2012. One data point should be interpreted  
471 as the fraction of children having their birthday in the given month and who received one dose of  
472 MMR vaccine on or after their first birthday.

473

474 Figure 4. MMR2 Vaccination Coverage for 2011 and 2012. A data point represents the fraction  
475 of children whose birthday falls within the month and who received two doses of MMR vaccine,  
476 where the first dose was given on or after their first birthday.

477

478 Figure 5. Measles Transmission Model. All four cohorts are modeled separately, and children  
479 age out of one cohort into the next over time. After age 19, children are considered immune and  
480 removed from the system.

481

482 Figure 6. Smooth Contact Matrix for UK. Based on data from Polymod survey as reported by  
483 Mossong J et al. (2008), Social contacts and mixing patterns relevant to the spread of infectious  
484 diseases, PLoS Med 5(3):e74. doi:10.1371/journal.pmed.0050074

485



486 Figure 7A-D. Panel A shows the infectious cases on Feb 2012 (deeper red means more measles  
487 cases). Panels B-D show the ratio between the new number of infectious cases on Feb 1 2017  
488 and the reference for status quo, scenario A and scenario B respectively.

489

490 Figure 8. Incidence reported out of the measles model for year 2011 and 2012.

491

492 Figure 9. Predictive Scenarios. The plot shows total measles incidence predicted out 5 years  
493 (2013-2017) for the two scenarios studied as well as the status quo case.

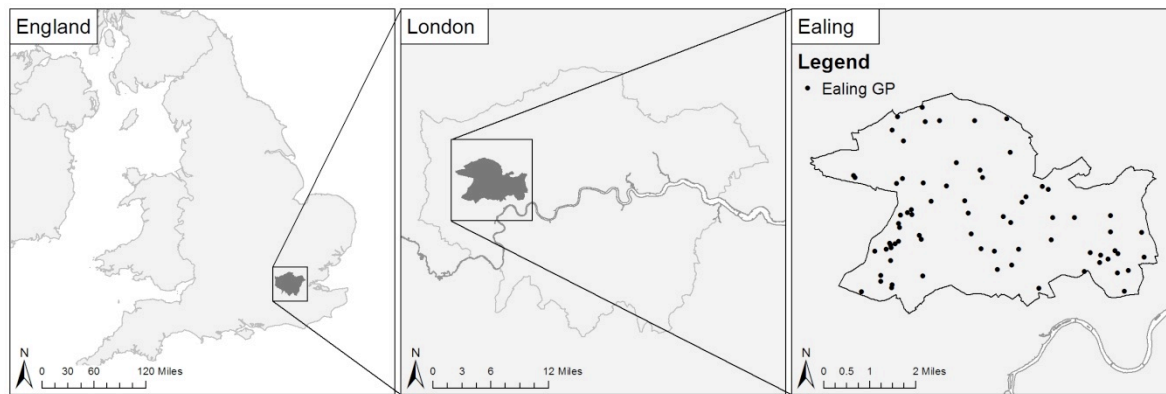

[Figure 1. Ealing and Ealing GPs.]

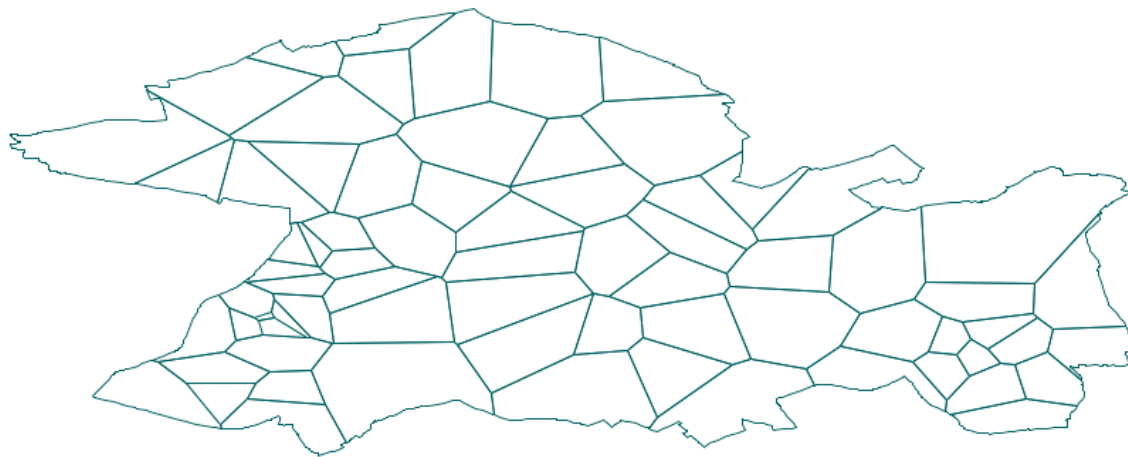

[Figure 2. Voronoi Tessellation around the geographic coordinates of the 73 Ealing GPs.]

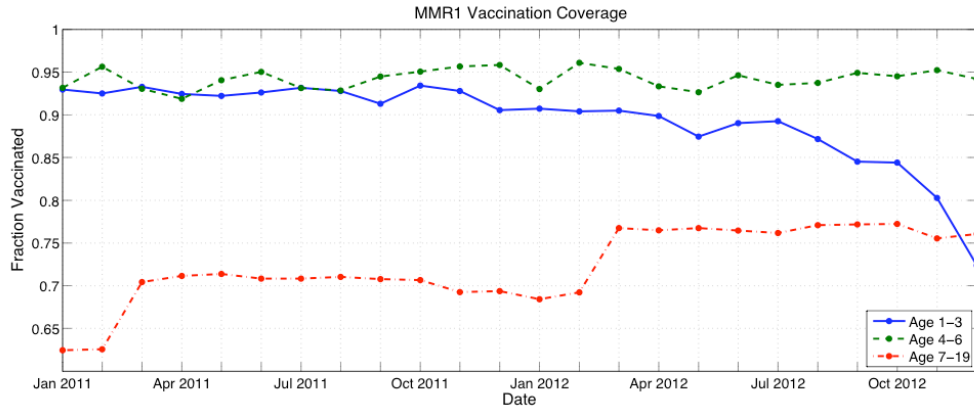

[Figure 3. MMR1 Vaccination Coverage for 2011 and 2012. One data point should be interpreted as the fraction of children having their birthday in the given month and who received one dose of MMR vaccine on or after their first birthday]

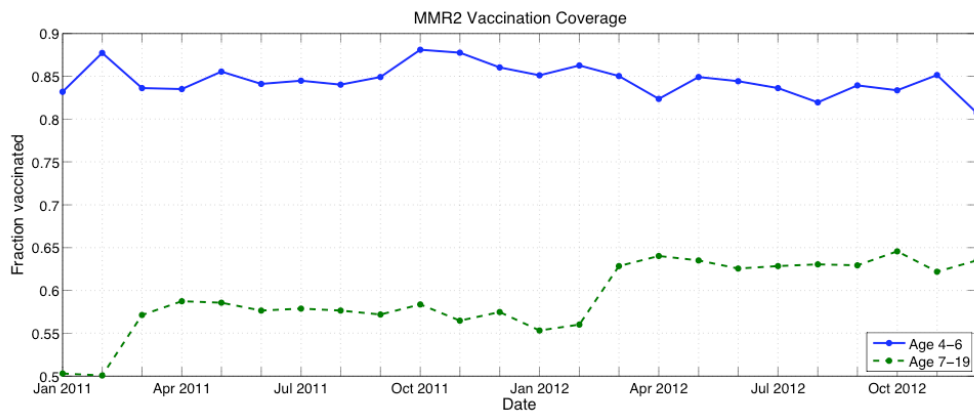

[Figure 4. MMR2 Vaccination Coverage for 2011 and 2012. A data point represents the fraction of children whose birthday falls within the month and who received two doses of MMR vaccine, where the first dose was given on or after their first birthday]

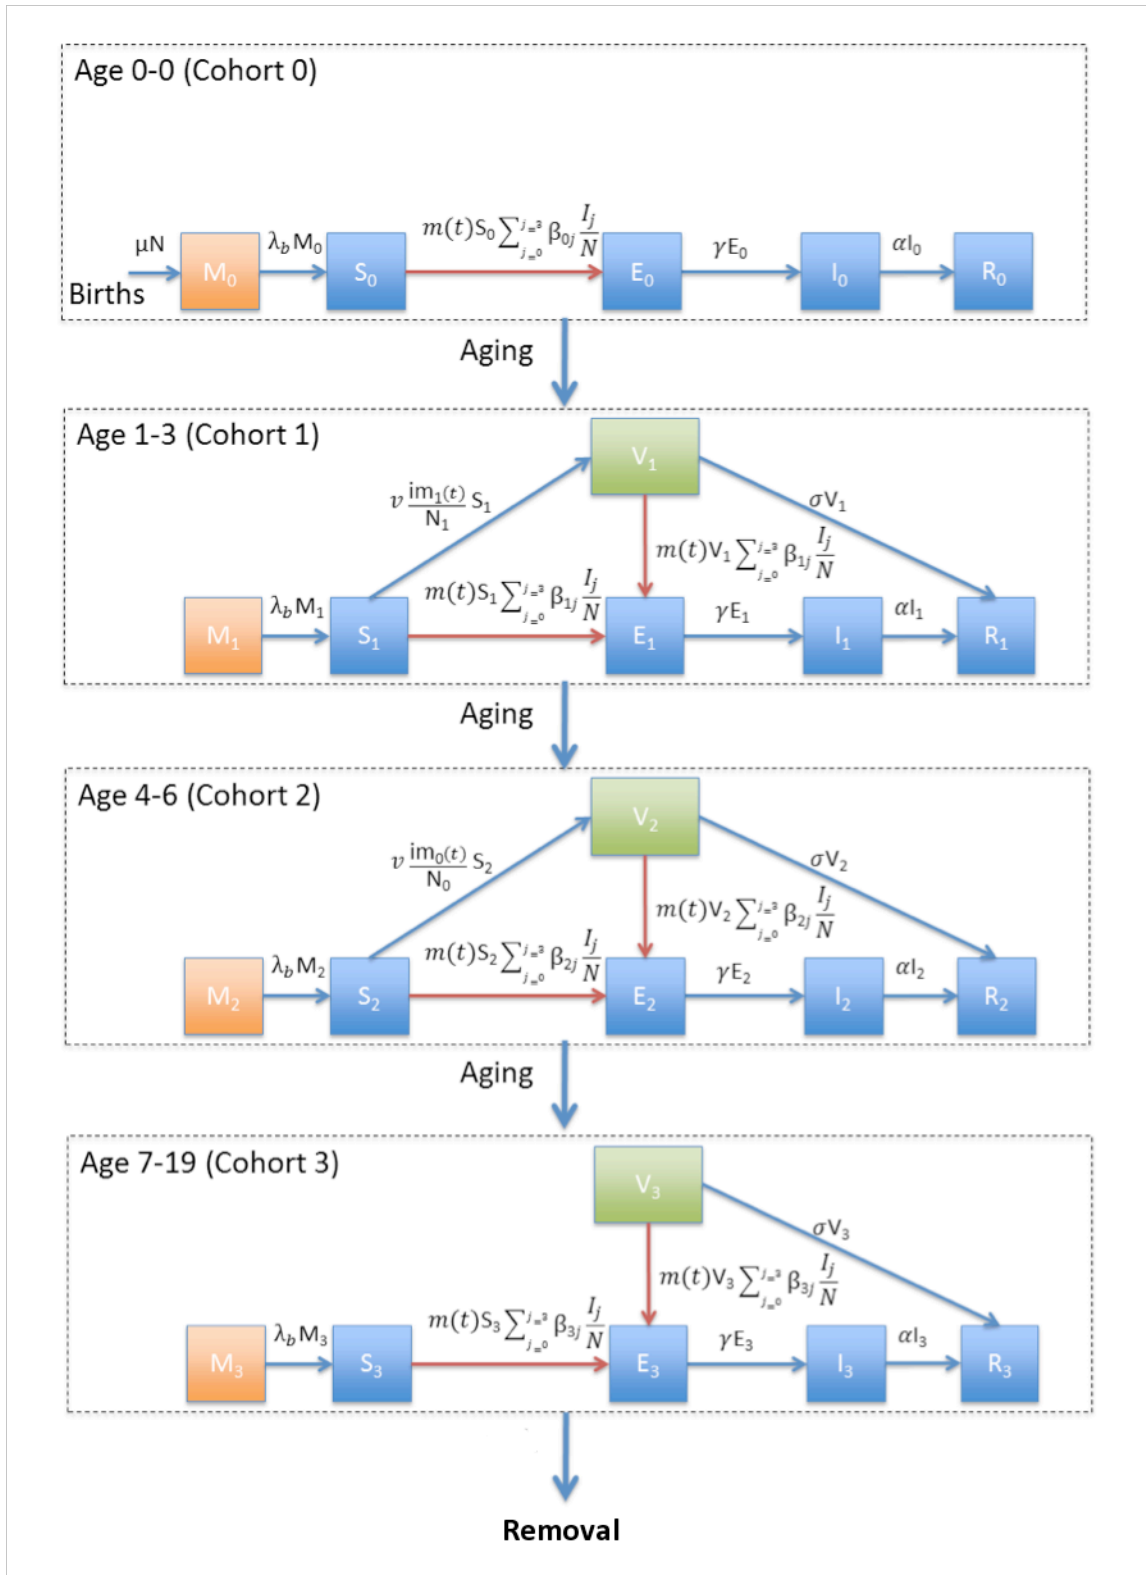

[Figure 5. Measles transmission model]

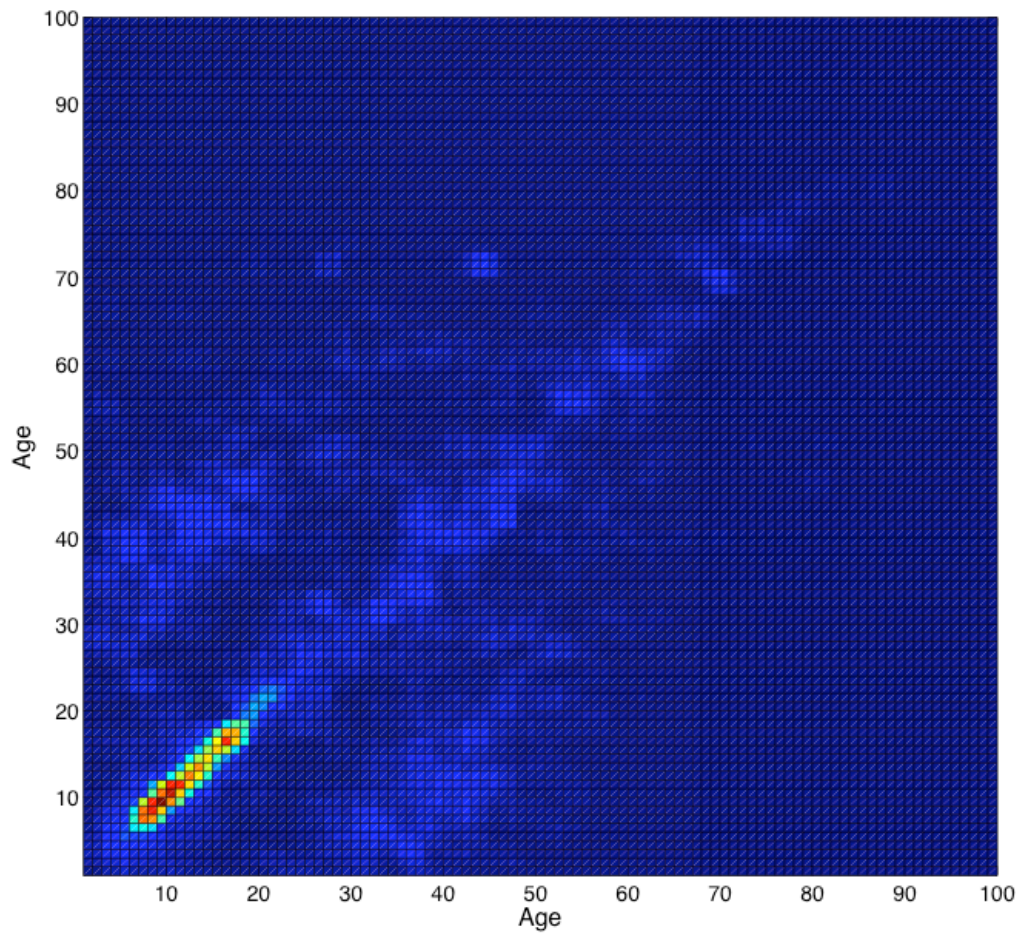

[Figure 6. Smooth contact matrix for UK based on data from Polymod survey (m)]

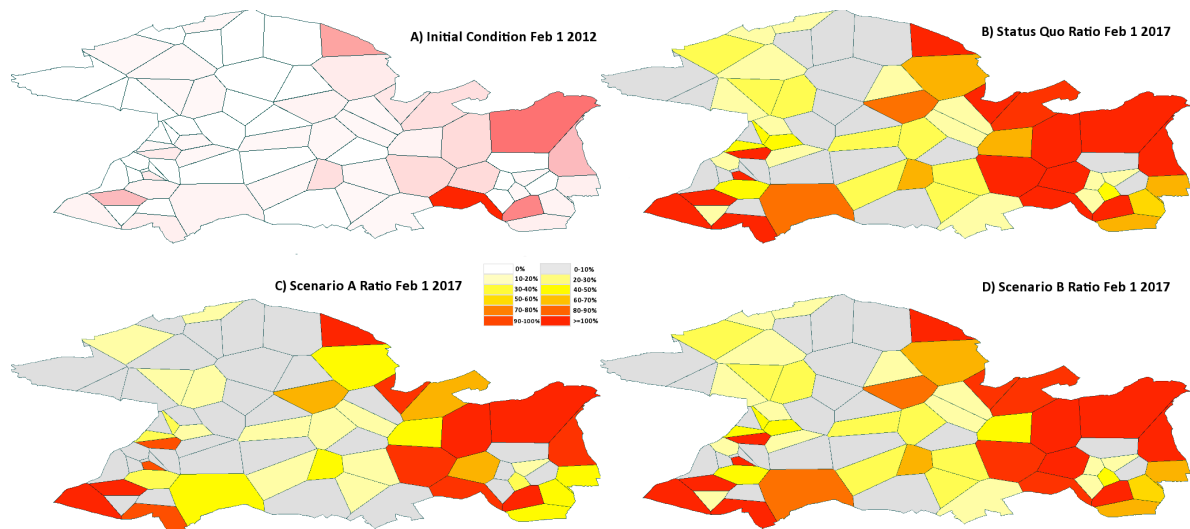

[Figure 7A-D. Panel A shows the infectious cases on Feb 2012 (deeper red means more measles cases). Panels B-D show the ratio between the new number of infectious cases on Feb 1 2017 and the reference for status quo, scenario A and scenario B respectively.]

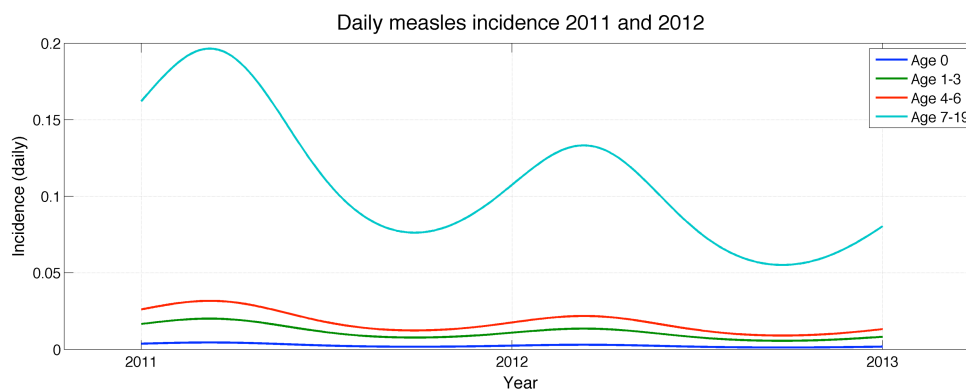

[Figure 8. Incidence reported out of the measles model for year 2011 and 2012]

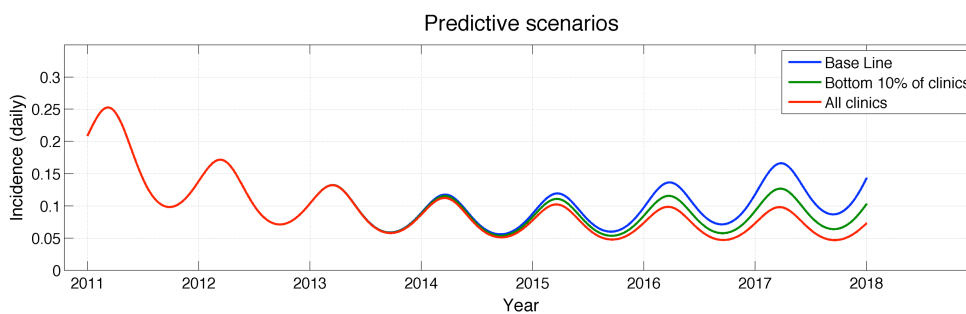

[Figure 9. The plot shows total measles incidence predicted out 5 years (2013-2017) for the two scenarios studied as well as the status quo case.]
